# Supplementary material
Source: publisher figshare collection journal article supplement (https://rs.figshare.com/ndownloader/files/12981788)
Supplement: Supplementary file 1 [file 12981788]

**Supplementary Table 1.** Details of antibodies used to detect protein and of cDNA clones used to generate RNA *in situ* probes

| **Antibody** | **Species, clonal characteristics, concentration** | | **Supplier and product number** |
| --- | --- | --- | --- |
| **Primary antibodies** | | | |
| anti-phospho-SMAD1/5/8 | Rabbit polyclonal; 1:200 | | Cell signalling #9511 |
| anti-FLAG | Mouse monoclonal; 1:200 | | Sigma F4042 |
| anti-GFP | Mouse monoclonal; 1:200 | | Invitrogen A11122 |
| anti-β-catenin | Mouse monoclonal; 1:200 | | BD Transduction Labs C19220-050 |
| **Secondary antibodies** | | | |
| anti-mouse Alkaline phosphatase | Goat, 1:300 (Colourimetric) | | Santa Cruz sc-2008 |
| anti-rabbit IgG-Alkaline Phosphatase | Goat, 1:300 (Colourimetric) | | Invitrogen G21079 |
| biotinylated anti-mouse | Goat, 1:250 (floursecent) | | Santa Cruz sc-2039 |
| AlexaFlour 568 conjugated tyramide | 1:400 (floursecent) | | Invitrogen T20934 |
|  |  | |  |
| **Gene** | **Gene Ref Sequence** | | **Alignment of cDNA on Ref sequence** |
| **Mouse cDNA clones used to generate RNA *in situ* probes** | | | |
| Wnt2 | NM_023653.4 | | Nucleotide 35-1510 |
| Wnt2b | NM_009520.3 | | Nucleotide 1010-1215 |
| Wnt4 | NM_009523.1 | | Nucleotide 639-1101 |
| Wnt5a | NM_009524.2 | | Nucleotide 576-2714 |
| Wnt5b | NM_009525.2 | | Nucleotide 111-1429 |
| Wnt9a | NM_139298.2 | | Nucleotide 1698-2247 |
| Wnt11 | NM_009519.1 | | Nucleotide 169-1821 |
| Fzd3 | NM_021458.1 | | Nucleotide 1-1321 |
| Fzd6 | NM_008056.2 | | Nucleotide 1794-2642 |
| mβcatenin | NM_001165902.1 | | Nucleotide 2069-2496 |
| Sfrp2 | U88567.1 | | Nucleotide 82 to 852 |
| Col2a1 | NM_03163.3 | | Nucleotide 68-5,149 |
| **Chick cDNA clones used to generate RNA *in situ* probes** | | | |
| cCol2a1 | NM_204426.1 | Nucleotide to 3887-4689 | |
| cSfrp2 | AF2 18056 | Nucleotide 520-1317 | |
